# Supplementary material for: Spatial and Temporal Variations in Richness, Diversity and Abundance of Floral Visitors of Curry Plants (Bergera koenigii L.): Insights on Plant-Pollinator Interactions
Source: MDPI journal article supplement (doi:10.3390/insects15020083), 2024-01-24
Supplement: s1 [file s1]

**Supplementary Table S3.** Daytime-wise flower handling time of visitors on curry flowers.

| Floral visitors                | Daytime-wise (h) flower handling time (sec) |              |              |              |              |              |
|--------------------------------|---------------------------------------------|--------------|--------------|--------------|--------------|--------------|
|                                | 6.00-8.00                                   | 8.00-10.00   | 10.00-12.00  | 12.00-14.00  | 14.00-16.00  | 16.00-18.00  |
| ▪ Diptera                      |                                             |              |              |              |              |              |
| <i>Oplodontha viridula</i>     | -                                           | -            | -            | -            | -            | -            |
| <i>Stomorhina discolor</i>     | -                                           | -            | -            | -            | -            | -            |
| ▪ Hymenoptera                  |                                             |              |              |              |              |              |
| <i>Amegilla zonata</i>         | 1.76 ± 0.46                                 | 1.53 ± 0.42  | 1.38 ± 0.39  | 1.27 ± 0.38  | 1.39 ± 0.41  | 1.54 ± 0.43  |
| <i>Apis cerana</i>             | 5.44 ± 1.69                                 | 4.52 ± 1.11  | 3.69 ± 0.90  | 3.23 ± 0.68  | 3.38 ± 0.65  | 3.77 ± 0.97  |
| <i>Apis dorsata</i>            | 2.01 ± 0.54                                 | 1.67 ± 0.58  | 1.42 ± 0.48  | 1.32 ± 0.51  | 1.52 ± 0.55  | 1.65 ± 0.53  |
| <i>Apis florea</i>             | 4.17 ± 1.42                                 | 3.86 ± 1.27  | 3.45 ± 1.15  | 3.23 ± 1.08  | 3.49 ± 1.32  | 3.74 ± 1.38  |
| <i>Ceratina binghami</i>       | 9.13 ± 4.87                                 | 8.17 ± 4.33  | 7.06 ± 3.92  | 7.25 ± 4.11  | 7.71 ± 4.30  | 8.32 ± 4.35  |
| <i>Ceratina compacta</i>       | 8.65 ± 4.36                                 | 7.52 ± 3.97  | 7.13 ± 3.61  | 7.28 ± 3.65  | 7.64 ± 3.83  | 7.86 ± 3.92  |
| <i>Halictus acrocephalus</i>   | 10.30 ± 5.29                                | 8.76 ± 3.34  | 7.53 ± 2.58  | 6.34 ± 2.85  | 6.81 ± 2.15  | 7.50 ± 2.15  |
| <i>Lasioglossum funebre</i>    | 7.07 ± 3.24                                 | 6.21 ± 2.96  | 5.62 ± 2.63  | 5.92 ± 2.72  | 6.35 ± 2.98  | 6.93 ± 3.17  |
| <i>Nomia iridescentis</i>      | 7.70 ± 3.45                                 | 5.89 ± 3.03  | 5.40 ± 2.78  | 5.01 ± 2.01  | 5.29 ± 2.47  | 5.56 ± 1.88  |
| <i>Scolia soror</i>            | 4.11 ± 1.40                                 | 3.64 ± 1.25  | 3.24 ± 1.04  | 3.06 ± 0.93  | 3.28 ± 1.07  | 3.67 ± 1.31  |
| <i>Sphecodes gibbus</i>        | 4.06 ± 1.32                                 | 3.83 ± 1.26  | 3.37 ± 1.09  | 2.91 ± 0.84  | 3.16 ± 0.92  | 3.55 ± 1.16  |
| <i>Tetragonula iridipennis</i> | 16.16 ± 5.09                                | 14.49 ± 4.77 | 12.66 ± 3.74 | 13.02 ± 4.42 | 13.83 ± 4.00 | 14.10 ± 4.03 |
| <i>Thyreus nitidulus</i>       | 3.48 ± 1.16                                 | 3.19 ± 1.02  | 2.72 ± 0.76  | 2.89 ± 0.79  | 3.23 ± 1.04  | 3.51 ± 1.19  |
| ▪ Lepidoptera                  |                                             |              |              |              |              |              |
| <i>Ancistroides folus</i>      | 11.03 ± 4.23                                | 10.35 ± 3.94 | 8.97 ± 3.52  | 9.23 ± 3.67  | 9.54 ± 3.85  | 9.92 ± 3.91  |
| <i>Anthene lycaenina</i>       | 14.46 ± 4.85                                | 12.89 ± 4.37 | 10.82 ± 3.91 | 11.24 ± 4.19 | 11.56 ± 4.22 | 11.93 ± 4.36 |
| <i>Appias libythea</i>         | 7.50 ± 2.49                                 | 6.06 ± 1.98  | 5.69 ± 2.34  | 5.08 ± 2.12  | 5.56 ± 2.10  | 5.97 ± 2.44  |
| <i>Baoris farri</i>            | 10.85 ± 4.08                                | 10.14 ± 3.95 | 8.83 ± 3.87  | 9.12 ± 3.89  | 9.42 ± 3.92  | 9.74 ± 4.12  |
| <i>Catochrysops strato</i>     | 14.76 ± 4.97                                | 13.22 ± 4.62 | 11.46 ± 4.39 | 11.65 ± 4.38 | 11.97 ± 4.43 | 12.39 ± 4.58 |
| <i>Catopsilia pomona</i>       | 7.72 ± 3.68                                 | 7.08 ± 3.46  | 6.21 ± 3.32  | 6.73 ± 3.48  | 7.23 ± 3.57  | 7.51 ± 3.63  |
| <i>Chilades lajus</i>          | 13.84 ± 5.72                                | 12.65 ± 5.41 | 10.98 ± 5.13 | 10.81 ± 5.04 | 11.15 ± 5.16 | 11.67 ± 5.32 |
| <i>Chilades pandava</i>        | 14.67 ± 6.13                                | 13.12 ± 5.38 | 11.43 ± 5.26 | 11.58 ± 5.29 | 11.84 ± 5.32 | 12.36 ± 5.36 |
| <i>Danaus chrysippus</i>       | 7.01 ± 2.31                                 | 6.33 ± 2.16  | 6.04 ± 1.95  | 6.38 ± 2.17  | 6.49 ± 2.23  | 7.15 ± 2.38  |
| <i>Danaus genutia</i>          | 5.60 ± 1.63                                 | 5.07 ± 1.42  | 4.56 ± 1.27  | 4.89 ± 1.35  | 5.12 ± 1.44  | 5.48 ± 1.57  |
| <i>Euploea core</i>            | 7.94 ± 2.54                                 | 7.37 ± 2.35  | 6.62 ± 2.17  | 6.95 ± 2.24  | 7.41 ± 2.38  | 7.73 ± 2.45  |
| <i>Eurema blanda</i>           | 7.17 ± 2.36                                 | 6.54 ± 2.17  | 6.15 ± 1.94  | 6.69 ± 2.19  | 6.83 ± 2.26  | 7.46 ± 2.42  |
| <i>Eurema hecabe</i>           | 6.93 ± 2.25                                 | 6.28 ± 2.06  | 5.84 ± 1.83  | 6.28 ± 2.08  | 6.39 ± 2.17  | 7.12 ± 2.31  |
| <i>Jamides bochus</i>          | 14.25 ± 6.37                                | 12.63 ± 5.84 | 10.79 ± 5.31 | 11.02 ± 5.42 | 11.34 ± 5.52 | 11.73 ± 5.61 |
| <i>Junonia almana</i>          | 5.82 ± 1.69                                 | 5.26 ± 1.47  | 4.83 ± 1.24  | 5.14 ± 1.37  | 5.52 ± 1.55  | 5.71 ± 1.62  |
| <i>Junonia atlites</i>         | 8.32 ± 2.71                                 | 7.69 ± 2.42  | 7.25 ± 2.18  | 7.84 ± 2.59  | 7.93 ± 2.61  | 8.55 ± 2.74  |
| <i>Junonia iphita</i>          | 15.66 ± 6.85                                | 13.91 ± 6.24 | 12.27 ± 5.69 | 12.23 ± 5.65 | 12.65 ± 5.82 | 12.74 ± 5.93 |
| <i>Leptosia nina</i>           | -                                           | -            | -            | -            | -            | -            |
| <i>Mycalasis perseus</i>       | 11.97 ± 5.93                                | 11.43 ± 5.41 | 10.14 ± 4.92 | 10.30 ± 5.13 | 10.32 ± 5.14 | 10.82 ± 5.37 |
| <i>Pachliopta hector</i>       | 5.73 ± 1.72                                 | 5.25 ± 1.56  | 4.72 ± 1.37  | 5.03 ± 1.48  | 5.41 ± 1.63  | 5.60 ± 1.68  |
| <i>Papilio demoleus</i>        | 5.23 ± 1.47                                 | 4.64 ± 1.28  | 4.28 ± 1.03  | 4.50 ± 1.24  | 4.86 ± 1.32  | 5.17 ± 1.39  |
| <i>Papilio polytes</i>         | 5.96 ± 1.74                                 | 5.48 ± 1.56  | 5.05 ± 1.35  | 5.31 ± 1.48  | 5.83 ± 1.63  | 5.87 ± 1.66  |
| <i>Pareronia hippie</i>        | 7.83 ± 2.49                                 | 7.26 ± 2.23  | 6.57 ± 2.06  | 6.84 ± 2.10  | 7.29 ± 2.25  | 7.61 ± 2.31  |
| <i>Rapala manea</i>            | 16.12 ± 7.13                                | 14.46 ± 6.75 | 12.73 ± 6.21 | 12.75 ± 6.26 | 13.16 ± 6.47 | 13.24 ± 6.50 |
| <i>Rapala varuna</i>           | 15.70 ± 6.95                                | 13.82 ± 6.28 | 12.30 ± 5.63 | 12.29 ± 5.64 | 12.58 ± 5.71 | 12.95 ± 5.83 |
| <i>Suastus gremius</i>         | 14.41 ± 6.38                                | 12.94 ± 5.82 | 11.28 ± 5.39 | 11.35 ± 5.42 | 11.61 ± 5.53 | 12.09 ± 5.68 |
| <i>Syntomoides imacon</i>      | 2.83 ± 0.62                                 | 2.62 ± 0.59  | 2.39 ± 0.53  | 2.68 ± 0.56  | 2.74 ± 0.58  | 2.88 ± 0.64  |
| <i>Tarucus indica</i>          | 14.21 ± 6.27                                | 12.84 ± 5.94 | 11.45 ± 5.52 | 11.47 ± 5.54 | 11.53 ± 5.59 | 12.18 ± 5.72 |
| <i>Telicota colon</i>          | 11.14 ± 5.46                                | 10.63 ± 5.27 | 9.21 ± 4.98  | 9.43 ± 5.03  | 9.62 ± 5.12  | 10.07 ± 5.27 |
| <i>Tirumala limniace</i>       | 7.05 ± 3.22                                 | 6.39 ± 3.05  | 5.94 ± 2.87  | 6.31 ± 2.91  | 6.82 ± 3.14  | 6.87 ± 3.16  |
