# Supplementary material for: Spatial and Temporal Variations in Richness, Diversity and Abundance of Floral Visitors of Curry Plants (Bergera koenigii L.): Insights on Plant-Pollinator Interactions
Source: MDPI journal article supplement (doi:10.3390/insects15020083), 2024-01-24
Supplement: s1 [file s1]

**Supplementary Table S4.** Daytime-wise proportion of different resource-collecting task allocation categories on curry flowers.

| Floral visitors                                                                                                                                                                                                                                                                                                                                                                                                                                                                                                                                                                                      | Daytime-wise (h) percentage of different categories |              |               |              |             |             |               |
|------------------------------------------------------------------------------------------------------------------------------------------------------------------------------------------------------------------------------------------------------------------------------------------------------------------------------------------------------------------------------------------------------------------------------------------------------------------------------------------------------------------------------------------------------------------------------------------------------|-----------------------------------------------------|--------------|---------------|--------------|-------------|-------------|---------------|
|                                                                                                                                                                                                                                                                                                                                                                                                                                                                                                                                                                                                      | 6.00-8.00                                           | 8.00-10.00   | 10.00-12.00   | 12.00-14.00  | 14.00-16.00 | 16.00-18.00 | Overall       |
| Floral visitors collected nectar and pollen grains                                                                                                                                                                                                                                                                                                                                                                                                                                                                                                                                                   |                                                     |              |               |              |             |             |               |
| ▪ Diptera                                                                                                                                                                                                                                                                                                                                                                                                                                                                                                                                                                                            |                                                     |              |               |              |             |             |               |
| <i>Oplodontha viridula</i>                                                                                                                                                                                                                                                                                                                                                                                                                                                                                                                                                                           | -                                                   | -            | -             | -            | -           | -           | -             |
| <i>Stomorphina discolor</i>                                                                                                                                                                                                                                                                                                                                                                                                                                                                                                                                                                          | -                                                   | -            | -             | -            | -           | -           | -             |
| ▪ Hymenoptera                                                                                                                                                                                                                                                                                                                                                                                                                                                                                                                                                                                        |                                                     |              |               |              |             |             |               |
| <i>Amegilla zonata</i>                                                                                                                                                                                                                                                                                                                                                                                                                                                                                                                                                                               |                                                     |              |               |              |             |             |               |
| Nectar foragers                                                                                                                                                                                                                                                                                                                                                                                                                                                                                                                                                                                      | 16.67 ± 6.17                                        | 20 ± 7.56    | 47.33 ± 9.61  | 69.33 ± 7.04 | 100         | 100         | 58.89 ± 34.69 |
| Pollen foragers                                                                                                                                                                                                                                                                                                                                                                                                                                                                                                                                                                                      | 0                                                   | 0            | 0             | 0            | 0           | 0           | 0             |
| Mixed foragers                                                                                                                                                                                                                                                                                                                                                                                                                                                                                                                                                                                       | 83.33 ± 6.17                                        | 80 ± 7.56    | 52.67 ± 9.61  | 30.67 ± 7.04 | 0           | 0           | 41.11 ± 34.69 |
| <i>Apis cerana</i>                                                                                                                                                                                                                                                                                                                                                                                                                                                                                                                                                                                   |                                                     |              |               |              |             |             |               |
| Nectar foragers                                                                                                                                                                                                                                                                                                                                                                                                                                                                                                                                                                                      | 32 ± 11.46                                          | 38 ± 9.41    | 56 ± 9.86     | 72 ± 6.76    | 100         | 100         | 66.33 ± 28.22 |
| Pollen foragers                                                                                                                                                                                                                                                                                                                                                                                                                                                                                                                                                                                      | 0                                                   | 0            | 0             | 0            | 0           | 0           | 0             |
| Mixed foragers                                                                                                                                                                                                                                                                                                                                                                                                                                                                                                                                                                                       | 68 ± 11.46                                          | 62 ± 9.41    | 44 ± 9.86     | 28 ± 6.76    | 0           | 0           | 33.67 ± 28.22 |
| <i>Apis dorsata</i>                                                                                                                                                                                                                                                                                                                                                                                                                                                                                                                                                                                  |                                                     |              |               |              |             |             |               |
| Nectar foragers                                                                                                                                                                                                                                                                                                                                                                                                                                                                                                                                                                                      | 70 ± 7.56                                           | 76 ± 9.86    | 82 ± 9.41     | 90.67 ± 7.04 | 100         | 100         | 86.44 ± 13.35 |
| Pollen foragers                                                                                                                                                                                                                                                                                                                                                                                                                                                                                                                                                                                      | 0                                                   | 0            | 0             | 0            | 0           | 0           | 0             |
| Mixed foragers                                                                                                                                                                                                                                                                                                                                                                                                                                                                                                                                                                                       | 30 ± 7.56                                           | 24 ± 9.86    | 18 ± 9.41     | 9.33 ± 7.04  | 0           | 0           | 13.56 ± 13.35 |
| <i>Apis florea</i>                                                                                                                                                                                                                                                                                                                                                                                                                                                                                                                                                                                   |                                                     |              |               |              |             |             |               |
| Nectar foragers                                                                                                                                                                                                                                                                                                                                                                                                                                                                                                                                                                                      | 69 ± 11.01                                          | 73 ± 11.60   | 77 ± 9.49     | 88 ± 7.89    | 100         | 100         | 84.50 ± 14.78 |
| Pollen foragers                                                                                                                                                                                                                                                                                                                                                                                                                                                                                                                                                                                      | 0                                                   | 0            | 0             | 0            | 0           | 0           | 0             |
| Mixed foragers                                                                                                                                                                                                                                                                                                                                                                                                                                                                                                                                                                                       | 31 ± 11.01                                          | 27 ± 11.60   | 23 ± 9.49     | 12 ± 7.89    | 0           | 0           | 15.50 ± 14.78 |
| <i>Ceratina binghami</i>                                                                                                                                                                                                                                                                                                                                                                                                                                                                                                                                                                             |                                                     |              |               |              |             |             |               |
| Nectar foragers                                                                                                                                                                                                                                                                                                                                                                                                                                                                                                                                                                                      | 16.67 ± 9.58                                        | 21 ± 9.26    | 50 ± 9.93     | 72.33 ± 8.37 | 100         | 100         | 60 ± 36.62    |
| Pollen foragers                                                                                                                                                                                                                                                                                                                                                                                                                                                                                                                                                                                      | 0                                                   | 0            | 0             | 0            | 0           | 0           | 0             |
| Mixed foragers                                                                                                                                                                                                                                                                                                                                                                                                                                                                                                                                                                                       | 83.33 ± 9.58                                        | 79 ± 9.26    | 50 ± 9.93     | 27.67 ± 8.37 | 0           | 0           | 40 ± 36.62    |
| <i>Ceratina compacta</i>                                                                                                                                                                                                                                                                                                                                                                                                                                                                                                                                                                             |                                                     |              |               |              |             |             |               |
| Nectar foragers                                                                                                                                                                                                                                                                                                                                                                                                                                                                                                                                                                                      | 15 ± 9.74                                           | 18.67 ± 9.35 | 47.33 ± 10.26 | 70 ± 9.78    | 100         | 100         | 58.50 ± 37.84 |
| Pollen foragers                                                                                                                                                                                                                                                                                                                                                                                                                                                                                                                                                                                      | 0                                                   | 0            | 0             | 0            | 0           | 0           | 0             |
| Mixed foragers                                                                                                                                                                                                                                                                                                                                                                                                                                                                                                                                                                                       | 85 ± 9.74                                           | 81.33 ± 9.35 | 52.67 ± 10.26 | 30 ± 9.78    | 0           | 0           | 41.50 ± 37.84 |
| <i>Halictus acrocephalus</i>                                                                                                                                                                                                                                                                                                                                                                                                                                                                                                                                                                         |                                                     |              |               |              |             |             |               |
| Nectar foragers                                                                                                                                                                                                                                                                                                                                                                                                                                                                                                                                                                                      | 8 ± 7.75                                            | 12 ± 10.82   | 39.33 ± 9.61  | 64 ± 9.86    | 100         | 100         | 53.89 ± 38.44 |
| Pollen foragers                                                                                                                                                                                                                                                                                                                                                                                                                                                                                                                                                                                      | 0                                                   | 0            | 0             | 0            | 0           | 0           | 0             |
| Mixed foragers                                                                                                                                                                                                                                                                                                                                                                                                                                                                                                                                                                                       | 92 ± 7.75                                           | 88 ± 10.82   | 60.67 ± 9.61  | 36 ± 9.86    | 0           | 0           | 46.11 ± 38.44 |
| <i>Lasioglossum funebre</i>                                                                                                                                                                                                                                                                                                                                                                                                                                                                                                                                                                          |                                                     |              |               |              |             |             |               |
| Nectar foragers                                                                                                                                                                                                                                                                                                                                                                                                                                                                                                                                                                                      | 15.67 ± 9.26                                        | 19.33 ± 8.68 | 49 ± 8.27     | 71 ± 7.48    | 100         | 100         | 59.27 ± 36.91 |
| Pollen foragers                                                                                                                                                                                                                                                                                                                                                                                                                                                                                                                                                                                      | 0                                                   | 0            | 0             | 0            | 0           | 0           | 0             |
| Mixed foragers                                                                                                                                                                                                                                                                                                                                                                                                                                                                                                                                                                                       | 84.33 ± 9.26                                        | 80.67 ± 8.68 | 51 ± 8.27     | 29 ± 7.48    | 0           | 0           | 40.83 ± 36.91 |
| <i>Tetragonula iridipennis</i>                                                                                                                                                                                                                                                                                                                                                                                                                                                                                                                                                                       |                                                     |              |               |              |             |             |               |
| Nectar foragers                                                                                                                                                                                                                                                                                                                                                                                                                                                                                                                                                                                      | 9.33 ± 5.94                                         | 16.67 ± 6.17 | 39.33 ± 7.04  | 66 ± 9.86    | 100         | 100         | 55.22 ± 37.12 |
| Pollen foragers                                                                                                                                                                                                                                                                                                                                                                                                                                                                                                                                                                                      | 5.33 ± 7.43                                         | 5.33 ± 7.43  | 4.67 ± 6.40   | 0            | 0           | 0           | 2.56 ± 5.52   |
| Mixed foragers                                                                                                                                                                                                                                                                                                                                                                                                                                                                                                                                                                                       | 85.33 ± 9.90                                        | 78 ± 8.62    | 56 ± 11.21    | 34 ± 9.86    | 0           | 0           | 42.22 ± 35.15 |
| Floral visitors collected only nectar                                                                                                                                                                                                                                                                                                                                                                                                                                                                                                                                                                |                                                     |              |               |              |             |             |               |
| Ancistroides folus, Anthene lycaenina, Appias libythea, Baoris farri, Catochrysops strato, Catopsilia Pomona, Chilades lajus, Chilades pandava, Danaus chrysippus, Danaus genutia, Euploea core, Eurema blanda, Eurema hecabe, Jamides bochus, Junonia almanac, Junonia atlites, Junonia iphita, Leptosia nina, Mycalesis perseus, Nomia iridescens, Pachlioapta hector, Papilio demoleus, Papilio polytes, Pareronia hippie, Rapala manea, Rapala varuna, Scolia soror, Sphecodes gibbus, Suastus gremius, Syntomoides imacon, Tarucus indica, Telicota colon, Tirumala limniace, Thyreus nitidulus |                                                     |              |               |              |             |             |               |
