# Supplementary material for: Spatial and Temporal Variations in Richness, Diversity and Abundance of Floral Visitors of Curry Plants (Bergera koenigii L.): Insights on Plant-Pollinator Interactions
Source: MDPI journal article supplement (doi:10.3390/insects15020083), 2024-01-24
Supplement: s1 [file s1]

**Supplementary Table S2.** Daytime-wise flower visitation rates of visitors on curry flowers.

| Floral visitors                | Daytime-wise (h) flower visitation rate |              |              |              |              |              |
|--------------------------------|-----------------------------------------|--------------|--------------|--------------|--------------|--------------|
|                                | 6.00-8.00                               | 8.00-10.00   | 10.00-12.00  | 12.00-14.00  | 14.00-16.00  | 16.00-18.00  |
| ▪ Diptera                      |                                         |              |              |              |              |              |
| <i>Oplodontha viridula</i>     | -                                       | -            | -            | -            | -            | -            |
| <i>Stomorhina discolor</i>     | -                                       | -            | -            | -            | -            | -            |
| ▪ Hymenoptera                  |                                         |              |              |              |              |              |
| <i>Amegilla zonata</i>         | 12.27 ± 2.86                            | 14.50 ± 3.12 | 16.73 ± 3.21 | 16.23 ± 3.16 | 14.33 ± 2.08 | 13.93 ± 2.95 |
| <i>Apis cerana</i>             | 7.73 ± 1.70                             | 10.97 ± 2.06 | 11.73 ± 2.46 | 11.10 ± 2.59 | 10.07 ± 2.13 | 8.53 ± 1.72  |
| <i>Apis dorsata</i>            | 13.37 ± 3.11                            | 17.53 ± 3.61 | 20.57 ± 4.31 | 19.37 ± 4.20 | 16.50 ± 3.14 | 13.90 ± 2.92 |
| <i>Apis florea</i>             | 9.55 ± 1.93                             | 11.95 ± 2.04 | 13.50 ± 2.13 | 12.25 ± 2.09 | 11.30 ± 1.96 | 10.25 ± 1.95 |
| <i>Ceratina binghami</i>       | 6.23 ± 1.50                             | 7.87 ± 1.62  | 8.97 ± 1.71  | 6.73 ± 1.54  | 6.17 ± 1.48  | 5.63 ± 1.52  |
| <i>Ceratina compacta</i>       | 5.97 ± 1.57                             | 7.53 ± 1.65  | 8.77 ± 1.76  | 8.03 ± 1.69  | 7.10 ± 1.64  | 6.23 ± 1.62  |
| <i>Halictus acrocephalus</i>   | 4.67 ± 2.02                             | 7.70 ± 2.68  | 9.00 ± 2.36  | 8.03 ± 2.33  | 7.10 ± 2.43  | 5.67 ± 2.09  |
| <i>Lasioglossum funebre</i>    | 5.37 ± 1.42                             | 6.53 ± 1.58  | 8.30 ± 1.63  | 7.63 ± 1.59  | 7.27 ± 1.61  | 7.03 ± 1.63  |
| <i>Nomia iridescens</i>        | 8.65 ± 2.11                             | 12.15 ± 2.21 | 12.75 ± 2.97 | 12.35 ± 3.17 | 11.15 ± 2.41 | 9.55 ± 2.42  |
| <i>Scolia soror</i>            | 6.15 ± 1.34                             | 7.65 ± 1.48  | 8.65 ± 1.52  | 7.20 ± 1.38  | 6.80 ± 1.36  | 6.45 ± 1.37  |
| <i>Sphecodes gibbus</i>        | 9.20 ± 1.85                             | 11.30 ± 1.96 | 12.20 ± 2.09 | 12 ± 2.04    | 11.50 ± 2.06 | 11.10 ± 2.05 |
| <i>Tetragonula iridipennis</i> | 1.87 ± 0.86                             | 2.47 ± 0.97  | 2.97 ± 1.16  | 2.70 ± 1.02  | 2.23 ± 1.01  | 2.03 ± 0.81  |
| <i>Thyreus nitidulus</i>       | 12.50 ± 3.12                            | 13.80 ± 3.15 | 15.30 ± 3.19 | 14.20 ± 3.17 | 13.80 ± 3.17 | 13.20 ± 3.16 |
| ▪ Lepidoptera                  |                                         |              |              |              |              |              |
| <i>Ancistroides folus</i>      | 2.10 ± 0.94                             | 2.90 ± 0.98  | 3.70 ± 1.15  | 3.50 ± 1.09  | 3.10 ± 1.06  | 2.80 ± 1.05  |
| <i>Anthene lycaenina</i>       | 1.70 ± 0.82                             | 2.20 ± 0.95  | 2.70 ± 0.97  | 2.30 ± 0.96  | 2.10 ± 0.97  | 1.90 ± 0.96  |
| <i>Appias libythea</i>         | 3.67 ± 1.37                             | 5.07 ± 1.48  | 6.07 ± 1.72  | 5.47 ± 1.59  | 4.63 ± 1.33  | 3.57 ± 1.33  |
| <i>Baoris farri</i>            | 2.17 ± 0.95                             | 3.03 ± 1.02  | 3.83 ± 1.26  | 3.67 ± 1.24  | 2.97 ± 1.13  | 2.50 ± 1.07  |
| <i>Catochrysops strato</i>     | 1.70 ± 0.84                             | 2.25 ± 0.96  | 2.80 ± 0.99  | 2.35 ± 0.97  | 2.10 ± 0.98  | 1.85 ± 0.97  |
| <i>Catopsilia pomona</i>       | 3.87 ± 1.32                             | 4.63 ± 1.46  | 5.20 ± 1.49  | 4.87 ± 1.48  | 4.50 ± 1.45  | 4.23 ± 1.42  |
| <i>Chilades lajus</i>          | 1.70 ± 0.83                             | 2.30 ± 0.95  | 2.60 ± 0.98  | 2.40 ± 0.96  | 2.00 ± 0.87  | 1.80 ± 0.85  |
| <i>Chilades pandava</i>        | 1.85 ± 0.87                             | 2.20 ± 0.94  | 2.70 ± 0.96  | 2.35 ± 0.96  | 2.10 ± 0.95  | 1.95 ± 0.96  |
| <i>Danaus chrysippus</i>       | 3.47 ± 1.25                             | 4.20 ± 1.42  | 4.90 ± 1.67  | 4.43 ± 1.51  | 4.13 ± 1.40  | 3.87 ± 1.38  |
| <i>Danaus genutia</i>          | 3.70 ± 1.38                             | 4.30 ± 1.43  | 4.80 ± 1.65  | 4.40 ± 1.50  | 4.20 ± 1.42  | 4.00 ± 1.41  |
| <i>Euploea core</i>            | 3.87 ± 1.39                             | 4.43 ± 1.52  | 4.93 ± 1.68  | 4.57 ± 1.57  | 4.27 ± 1.49  | 3.90 ± 1.44  |
| <i>Eurema blanda</i>           | 3.30 ± 1.22                             | 3.77 ± 1.29  | 4.03 ± 1.37  | 3.83 ± 1.35  | 3.50 ± 1.31  | 3.27 ± 1.23  |
| <i>Eurema hecabe</i>           | 3.57 ± 1.26                             | 3.90 ± 1.36  | 4.33 ± 1.39  | 4.07 ± 1.37  | 3.73 ± 1.28  | 3.40 ± 1.25  |
| <i>Jamides bochus</i>          | 1.90 ± 0.89                             | 2.30 ± 0.94  | 2.70 ± 0.97  | 2.40 ± 0.95  | 2.20 ± 0.91  | 1.90 ± 0.90  |
| <i>Junonia almana</i>          | 3.20 ± 1.17                             | 3.80 ± 1.47  | 4.30 ± 1.68  | 3.90 ± 1.59  | 3.60 ± 1.48  | 3.30 ± 1.26  |
| <i>Junonia atlites</i>         | 3.40 ± 1.24                             | 3.83 ± 1.36  | 4.17 ± 1.39  | 3.97 ± 1.37  | 3.60 ± 1.35  | 3.30 ± 1.32  |
| <i>Junonia iphita</i>          | 1.87 ± 0.88                             | 2.27 ± 0.95  | 2.60 ± 1.04  | 2.43 ± 0.99  | 2.13 ± 0.94  | 1.83 ± 0.87  |
| <i>Leptosia nina</i>           | -                                       | -            | -            | -            | -            | -            |
| <i>Mycalasis perseus</i>       | 1.70 ± 0.85                             | 2.00 ± 0.89  | 2.50 ± 0.97  | 2.20 ± 0.94  | 2.00 ± 0.91  | 1.80 ± 0.89  |
| <i>Pachliopta hector</i>       | 5.17 ± 2.12                             | 5.80 ± 2.28  | 6.53 ± 2.42  | 6.43 ± 2.40  | 6.17 ± 2.26  | 5.73 ± 2.25  |
| <i>Papilio demoleus</i>        | 6.00 ± 1.85                             | 6.90 ± 1.96  | 7.50 ± 2.14  | 7.20 ± 2.07  | 6.50 ± 1.93  | 6.10 ± 1.91  |
| <i>Papilio polytes</i>         | 5.13 ± 1.55                             | 5.76 ± 1.62  | 6.50 ± 1.73  | 6.47 ± 1.71  | 6.13 ± 1.63  | 5.70 ± 1.62  |
| <i>Pareronia hippie</i>        | 3.10 ± 1.45                             | 3.43 ± 1.53  | 3.73 ± 1.64  | 3.60 ± 1.61  | 3.23 ± 1.51  | 3.07 ± 1.42  |
| <i>Rapala manea</i>            | 1.67 ± 0.82                             | 2.03 ± 0.94  | 2.47 ± 1.13  | 2.30 ± 1.10  | 1.97 ± 0.95  | 1.73 ± 0.80  |
| <i>Rapala varuna</i>           | 1.77 ± 0.85                             | 2.27 ± 0.92  | 2.63 ± 1.07  | 2.40 ± 1.02  | 2.13 ± 0.98  | 1.87 ± 0.93  |
| <i>Suastus gremius</i>         | 2.23 ± 1.03                             | 2.77 ± 1.12  | 3.13 ± 1.27  | 2.97 ± 1.22  | 2.70 ± 1.23  | 2.53 ± 1.08  |
| <i>Syntomoides imacon</i>      | 9.67 ± 2.37                             | 11.53 ± 2.54 | 13.23 ± 2.85 | 12.73 ± 2.79 | 12.07 ± 2.68 | 11.27 ± 2.53 |
| <i>Tarucus indica</i>          | 1.40 ± 0.76                             | 1.80 ± 0.82  | 2.40 ± 0.95  | 2.20 ± 0.91  | 2.00 ± 0.88  | 1.90 ± 0.87  |
| <i>Telicota colon</i>          | 2.37 ± 1.01                             | 2.93 ± 1.22  | 3.20 ± 1.34  | 3.17 ± 1.31  | 2.83 ± 1.17  | 2.67 ± 1.13  |
| <i>Tirumala limniace</i>       | 4.83 ± 1.32                             | 5.40 ± 1.51  | 5.83 ± 1.69  | 5.43 ± 1.53  | 5.23 ± 1.48  | 4.97 ± 1.37  |
