# Supplementary material for: Spatial and Temporal Variations in Richness, Diversity and Abundance of Floral Visitors of Curry Plants (Bergera koenigii L.): Insights on Plant-Pollinator Interactions
Source: MDPI journal article supplement (doi:10.3390/insects15020083), 2024-01-24
Supplement: s1 [file s1]

**Supplementary Table S1.** Table S1. Relative abundances of different floral visitors on *Murraya koenigii* in West Bengal.

| Floral visitors                | Relative abundance (%) |                           |                        |
|--------------------------------|------------------------|---------------------------|------------------------|
|                                | Dense vegetation       | Medium-density vegetation | Low-density vegetation |
| ▪ Diptera                      |                        |                           |                        |
| <i>Oplodontha viridula</i>     | -                      | -                         | 0.99                   |
| <i>Stomorhina discolor</i>     | 0.37                   | 1.28                      | 0.82                   |
| ▪ Hymenoptera                  |                        |                           |                        |
| <i>Amegilla zonata</i>         | 1.24                   | 1.71                      | 1.65                   |
| <i>Apis cerana</i>             | 2.11                   | 2.84                      | 8.73                   |
| <i>Apis dorsata</i>            | 5.58                   | 2.99                      | 5.27                   |
| <i>Apis florea</i>             | 1.86                   | 1.42                      | -                      |
| <i>Ceratina binghami</i>       | 1.49                   | 0.85                      | 0.82                   |
| <i>Ceratina compacta</i>       | 1.61                   | 2.42                      | 2.47                   |
| <i>Halictus acrocephalus</i>   | 9.06                   | 17.78                     | 16.97                  |
| <i>Lasioglossum funebre</i>    | 2.98                   | 2.42                      | 2.64                   |
| <i>Nomia iridescent</i>        | 17.49                  | 8.82                      | -                      |
| <i>Scolia soror</i>            | 4.47                   | 1.42                      | -                      |
| <i>Sphecodes gibbus</i>        | 1.12                   | -                         | -                      |
| <i>Tetragonula iridipennis</i> | 5.96                   | 15.08                     | 20.43                  |
| <i>Thyreus nitidulus</i>       | 0.99                   | -                         | -                      |
| ▪ Lepidoptera                  |                        |                           |                        |
| <i>Ancistroides folus</i>      | 0.50                   | -                         | -                      |
| <i>Anthene lycaenina</i>       | 0.25                   | -                         | -                      |
| <i>Appias libythea</i>         | 14.64                  | 6.69                      | 7.25                   |
| <i>Baoris farri</i>            | 0.37                   | 1.28                      | 1.98                   |
| <i>Catochrysops strato</i>     | 0.62                   | 1.42                      | -                      |
| <i>Catopsilia pomona</i>       | 4.09                   | 6.26                      | 6.75                   |
| <i>Chilades lajus</i>          | 0.25                   | -                         | -                      |
| <i>Chilades pandava</i>        | 0.50                   | 1.50                      | -                      |
| <i>Danaus chrysippus</i>       | 1.99                   | 2.84                      | 2.31                   |
| <i>Danaus genutia</i>          | 0.74                   | -                         | -                      |
| <i>Euploea core</i>            | 1.61                   | 1.99                      | 2.14                   |
| <i>Eurema blanda</i>           | 1.24                   | 1.71                      | 1.32                   |
| <i>Eurema hecabe</i>           | 1.12                   | 1.28                      | 1.15                   |
| <i>Jamides bochus</i>          | 0.25                   | -                         | -                      |
| <i>Junonia almana</i>          | 0.62                   | -                         | -                      |
| <i>Junonia atlites</i>         | 1.86                   | 2.56                      | 2.80                   |
| <i>Junonia iphita</i>          | 1.36                   | 1.28                      | 0.99                   |
| <i>Leptosia nina</i>           | 0.62                   | 0.57                      | 0.49                   |
| <i>Mycalesis perseus</i>       | 0.99                   | -                         | -                      |
| <i>Pachliopta hector</i>       | 0.87                   | 1.14                      | 0.82                   |
| <i>Papilio demoleus</i>        | 0.74                   | -                         | -                      |
| <i>Papilio polytes</i>         | 1.24                   | 1.28                      | 1.15                   |
| <i>Pareronia hippie</i>        | 1.49                   | 1.99                      | 1.98                   |
| <i>Rapala manea</i>            | 0.62                   | 0.57                      | 0.82                   |
| <i>Rapala varuna</i>           | 0.50                   | 0.43                      | 0.82                   |
| <i>Suastus gremius</i>         | 2.11                   | 2.70                      | 2.64                   |
| <i>Syntomoides imaon</i>       | 0.62                   | 1.71                      | 2.31                   |
| <i>Tarucus indica</i>          | 0.37                   | -                         | -                      |
| <i>Telicota colon</i>          | 0.50                   | 0.43                      | 0.33                   |
| <i>Tirumala limniace</i>       | 0.99                   | 1.28                      | 1.15                   |
